# Supplementary material for: Long-term neurologically intact survival after extracorporeal cardiopulmonary resuscitation for in-hospital or out-of-hospital cardiac arrest: A systematic review and meta-analysis
Source: PubMed Central journal article supplement — Resusc Plus. 2020 Dec 11;4:100045. doi: 10.1016/j.resplu.2020.100045 (PMC8244502; doi:10.1016/j.resplu.2020.100045), 2020-12-11
Supplement: mmc2.pdf [file mmc2.pdf]

**eTable 2**  
Summary of findings

**Summary of findings for the main comparison**

| Overall analysis                                                               |                      |                        |                        |                        |                                      |                     |                |                     |                                              |                   |
|--------------------------------------------------------------------------------|----------------------|------------------------|------------------------|------------------------|--------------------------------------|---------------------|----------------|---------------------|----------------------------------------------|-------------------|
| <b>Patient or population:</b> Adult patients with cardiac arrest               |                      |                        |                        |                        |                                      |                     |                |                     |                                              |                   |
| <b>Settings:</b> In-hospital or out-of-hospital based                          |                      |                        |                        |                        |                                      |                     |                |                     |                                              |                   |
| <b>Intervention:</b> Extracorporeal cardiopulmonary resuscitation (ECPR)       |                      |                        |                        |                        |                                      |                     |                |                     |                                              |                   |
| <b>Comparison:</b> No ECPR                                                     |                      |                        |                        |                        |                                      |                     |                |                     |                                              |                   |
| Certainty assessment                                                           |                      |                        |                        |                        |                                      | Summary of findings |                |                     |                                              |                   |
| Number of studies, design                                                      | Risk of bias         | Inconsistency          | Indirectness           | Imprecision            | Publication bias                     | No of patients      |                | Effects             |                                              | Certainty         |
|                                                                                |                      |                        |                        |                        |                                      | ECPR                | Control        | Relative (95% CI)   | Absolute (95% CI)                            |                   |
| <b>Long-term in-hospital neurologically intact survival</b>                    |                      |                        |                        |                        |                                      |                     |                |                     |                                              |                   |
| 3 observational Studies*                                                       | Serious limitations§ | No serious limitations | No serious limitations | No serious limitations | Publication bias strongly suspected† | 37/164 (22.6%)      | 32/474 (6.8%)  | RR 3.21 (1.74–5.94) | 149 more per 1000 (from 50 more to 334 more) | ⊕⊖⊖⊖<br>Very low¶ |
| <b>Long-term out-of-hospital neurologically intact survival</b>                |                      |                        |                        |                        |                                      |                     |                |                     |                                              |                   |
| 3 observational Studies†                                                       | Serious limitations§ | No serious limitations | No serious limitations | No serious limitations | Publication bias strongly suspected† | 45/366 (12.3%)      | 44/746 (5.9%)  | RR 3.11 (1.50–6.47) | 124 more per 1000 (from 29 more to 323 more) | ⊕⊖⊖⊖<br>Very low¶ |
| <b>Long-term in-hospital or out-of-hospital neurologically intact survival</b> |                      |                        |                        |                        |                                      |                     |                |                     |                                              |                   |
| 6 observational studies‡                                                       | Serious limitations§ | No serious limitations | No serious limitations | No serious limitations | Publication bias strongly suspected† | 82/530 (15.5%)      | 76/1220 (6.2%) | RR 3.11 (2.06–4.69) | 131 more per 1000 (from 66 more to 230 more) | ⊕⊖⊖⊖<br>Very low¶ |

The risk in the intervention group (and its 95% confidence interval) is based on the comparison group and the relative effect of the intervention (and its 95% CI).

CI = confidence interval; RR = risk ratio.

GRADE Working Group grades of evidence

**High certainty:** We are very confident that the true effect lies close to that of the estimate of the effect.

**Moderate certainty:** We are moderately confident in the effect estimate; the true effect is likely to be close to the estimate of the effect, but there is a possibility that it is substantially different

**Low certainty:** Our confidence in the effect estimate is limited; the true effect may be substantially different from the estimate of the effect.

**Very low certainty:** We have very little confidence in the effect estimate; the true effect is likely to be substantially different from the estimate of effect.

Notes: In the GRADE approach to quality of evidence the observational studies without special strengths or important limitations provide low quality evidence. Based on GRADE criteria, the overall quality/certainty of evidence was very low across all outcomes, irrespective of where the point estimate and confidence interval lies. We are uncertain whether ECPR compared with no ECPR and/or conventional CPR improves long-term neurologically intact survival after cardiac arrest (as the certainty of the evidence has been assessed as very low).

\* Chen et al. 2008,<sup>48</sup> Shin et al. 2013,<sup>49</sup> Siao et al. 2015<sup>50</sup>

† Kim et al. 2014,<sup>45</sup> Maekawa et al. 2013,<sup>46</sup> Sakamoto et al. 2014<sup>47</sup>

‡ Chen et al. 2008,<sup>48</sup> Shin et al. 2013,<sup>49</sup> Siao et al. 2015,<sup>50</sup> Kim et al. 2014,<sup>45</sup> Maekawa et al. 2013,<sup>46</sup> Sakamoto et al. 2014<sup>47</sup>

§ High risk of confounding.

† Unable to assess publication bias due to limited number of studies.

¶ Downgraded by one level for serious risk of bias in all included studies.
