# Supplementary material for: Long-term neurologically intact survival after extracorporeal cardiopulmonary resuscitation for in-hospital or out-of-hospital cardiac arrest: A systematic review and meta-analysis
Source: PubMed Central journal article supplement — Resusc Plus. 2020 Dec 11;4:100045. doi: 10.1016/j.resplu.2020.100045 (PMC8244502; doi:10.1016/j.resplu.2020.100045), 2020-12-11
Supplement: mmc3.pdf [file mmc3.pdf]

**eTable 1**  
ROBINS-I assessment of risk of bias in included studies\*

| Author, year, country                         | Bias due to confounding <sup>†</sup> | Bias in selection of participants | Bias in classification of interventions | Bias due to deviations from intended interventions | Bias due to missing data <sup>‡</sup> | Bias in measurement of outcomes | Bias in selection of the reported result <sup>§</sup> | Overall |
|-----------------------------------------------|--------------------------------------|-----------------------------------|-----------------------------------------|----------------------------------------------------|---------------------------------------|---------------------------------|-------------------------------------------------------|---------|
| Chen et al. 2008 <sup>48</sup><br>Taiwan      | S                                    | L                                 | L                                       | L                                                  | L                                     | L                               | M                                                     | S       |
| Kim et al. 2014 <sup>45</sup><br>South Korea  | S                                    | L                                 | L                                       | L                                                  | L                                     | L                               | M                                                     | S       |
| Maekawa et al. 2013 <sup>46</sup><br>Japan    | S                                    | L                                 | L                                       | L                                                  | L                                     | L                               | M                                                     | S       |
| Sakamoto et al. 2014 <sup>47</sup><br>Japan   | S                                    | L                                 | L                                       | L                                                  | L                                     | L                               | M                                                     | S       |
| Shin et al. 2013 <sup>49</sup><br>South Korea | S                                    | L                                 | L                                       | L                                                  | L                                     | L                               | M                                                     | S       |
| Siao et al. 2015 <sup>50</sup><br>Taiwan      | S                                    | L                                 | L                                       | L                                                  | L                                     | L                               | M                                                     | S       |

Risk of bias: L = low risk; M = moderate risk; S = serious risk.

Risk of bias summary: Review authors' judgements about each risk of bias item for each included study. Based on the ROBINS-I tool all studies were deemed at overall serious risk of bias because they included at least one category with serious risk of bias.

\* All studies were deemed to have an overall serious risk of bias, which could also be considered critical, with confounding being the primary source of bias.

<sup>†</sup> Risk of bias from confounding was considered serious when confounding was not inherently controlled and when the possibility of residual (and unmeasured) confounders remained after adjusting for measured covariates, but could also be considered critical as the criteria to judge bias within the ROBINS-I tool are essentially subjective.

<sup>‡</sup> The majority of studies did not report on missing data, but could also be considered unknown.

<sup>§</sup> All studies were at moderate risk for selective outcome reporting since none provided a pre-registered protocol.
