# Supplementary material for: Long-term neurologically intact survival after extracorporeal cardiopulmonary resuscitation for in-hospital or out-of-hospital cardiac arrest: A systematic review and meta-analysis
Source: PubMed Central journal article supplement — Resusc Plus. 2020 Dec 11;4:100045. doi: 10.1016/j.resplu.2020.100045 (PMC8244502; doi:10.1016/j.resplu.2020.100045), 2020-12-11
Supplement: mmc4.pdf [file mmc4.pdf]

**Appendix A.** Literature search strategy for MEDLINE via PubMed

---

Date range: 01/01/2000 to 01/31/2020. Limited to humans.

Date searched: 01/31/2020

---

|     |                                                      |       |
|-----|------------------------------------------------------|-------|
| #1  | "Cardiac arrest"                                     |       |
| #2  | "Heart arrest"                                       |       |
| #3  | "Heart attack"                                       |       |
| #4  | "Cardiopulmonary arrest"                             |       |
| #5  | "In-hospital cardiac arrest"                         |       |
| #6  | "IHCA"                                               |       |
| #7  | "Out-of-hospital cardiac arrest"                     |       |
| #8  | "OHCA"                                               |       |
| #9  | #1 OR #2 OR #3 OR #4 OR #5 OR # 6 OR #7 OR #8        | 37540 |
| #10 | "Extracorporeal cardiopulmonary resuscitation"       |       |
| #11 | "Extracorporeal membrane oxygenation"                |       |
| #12 | "Extracorporeal circulation"                         |       |
| #13 | "Extracorporeal oxygenation"                         |       |
| #14 | "Extracorporeal life support"                        |       |
| #15 | "ECMO"                                               |       |
| #16 | "ECPR"                                               |       |
| #17 | "ECLS"                                               |       |
| #18 | #10 OR #11 OR #12 OR #13 OR #14 OR #15 OR #16 OR #17 | 17297 |
| #19 | "Resuscitation"                                      |       |
| #20 | "Cardiopulmonary resuscitation"                      |       |
| #21 | "Conventional cardiopulmonary resuscitation"         |       |
| #22 | "CPR"                                                |       |
| #23 | "CCPR"                                               |       |
| #24 | #19 OR #20 OR #21 OR #22 OR #22                      |       |
| #25 | #9 AND #18 AND # 24                                  | 997   |

---

Abbreviations: CCPR = conventional cardiopulmonary resuscitation; CPR = cardiopulmonary resuscitation; ECLS = extracorporeal life support; ECMO = extracorporeal membrane oxygenation; ECPR = extracorporeal cardiopulmonary resuscitation; IHCA = in-hospital cardiac arrest; OHCA = out-of-hospital cardiac arrest.

**Appendix A (continued).** Literature search strategy for MEDLINE via PubMed

---

Date range: 01/01/2000 to 01/31/2020. Limited to humans.

Date searched: 01/31/2020

---

((((((((((((cardia\* OR heart) AND arrest\*)) OR heart attack) OR cardiopulmonary arrest) OR (IHCA OR OHCA)) OR ihca ohca) OR in hospital cardiac arrest) OR out hospital cardiac arrest) OR out of hospital cardiac arrest) OR ((refractory) AND ((ventricular arrhythmia) OR ((tachycardia) OR fibrillation) AND ventricular)))) AND (((((extracorporeal oxygenation) OR ("extra corp\*") AND ("membran\* oxygenat\*" OR "life support\*")) OR (ECMO OR E-CMO OR ECLS OR E-CLS)) OR (ECPR OR E-CPR OR ECCO)) OR (((heart assist) OR resuscitation)) AND ("extra corp\*")) OR ((("extra corp\*")) AND (((cardiopulmonary resuscitation) OR cardiopulm\* AND resuscit\*) OR cardio-pulm\* AND resuscit\*) OR CPR)) AND (("2000/01/01"[PDat] : "2021/01/31"[PDat]) AND Humans[Mesh] AND adult[MeSH])

---

Abbreviations: CPR = cardiopulmonary resuscitation; ECLS = extracorporeal life support; ECMO = extracorporeal membrane oxygenation; ECPR = extracorporeal cardiopulmonary resuscitation; IHCA = in-hospital cardiac arrest; OHCA = out-of-hospital cardiac arrest.
