# Supplementary material for: Long-term neurologically intact survival after extracorporeal cardiopulmonary resuscitation for in-hospital or out-of-hospital cardiac arrest: A systematic review and meta-analysis
Source: PubMed Central journal article supplement — Resusc Plus. 2020 Dec 11;4:100045. doi: 10.1016/j.resplu.2020.100045 (PMC8244502; doi:10.1016/j.resplu.2020.100045), 2020-12-11
Supplement: mmc5.pdf [file mmc5.pdf]

## Appendix B. Studies with appropriate control group that did not fulfill inclusion criteria

---

Studies with appropriate control group reporting neurological intact survival in patients with refractory cardiac arrest treated with extracorporeal membrane oxygenation.

---

Schober A, Sterz F, Herkner H, et al. Emergency extracorporeal life support and ongoing resuscitation: a retrospective comparison for refractory out-of-hospital cardiac arrest. *Emerg Med J* 2017;34:277–81.

Kim SJ, Jung JS, Park JH, Park JS, Hong YS, Lee SW. An optimal transition time to extracorporeal cardiopulmonary resuscitation for predicting good neurological outcome in patients with out-of-hospital cardiac arrest: a propensity-matched study. *Crit care* 2014;18:535.

Bougouin W, Dumas F, Lamhaut L, et al. Extracorporeal cardiopulmonary resuscitation in out-of-hospital cardiac arrest: a registry study. *European Heart Journal* 202;41:1961–71.

Choi DH, Kim YJ, Ryoo SM, et al. Extracorporeal cardiopulmonary resuscitation among patients with out-of-hospital cardiac arrest. *Clin Exp Emerg Med* 2016;3:132–8.

Choi DS, Kim T, Ro YS, et al. Extracorporeal life support and survival after out-of-hospital cardiac arrest in a nationwide registry: A propensity score-matched analysis. *Resuscitation* 2016;99:26–32.

Matsuoka Y, Ikenoue T, Hata N, et al. Hospitals' extracorporeal cardiopulmonary resuscitation capabilities and outcomes in out-of-hospital cardiac arrest: A population-based study. *Resuscitation* 2019;136:85–92.

Poppe M, Weiser C, Holzer M, et al. The incidence of “load&go” out-of-hospital cardiac arrest candidates for emergency department utilization of emergency extracorporeal life support: a one-year review. *Resuscitation* 2015;91:131–6.

Yannopoulos D, Bartos JA, Martin C, et al. Minnesota resuscitation consortium's advanced perfusion and reperfusion cardiac life support strategy for out-of-hospital refractory ventricular fibrillation. *J Am Heart Assoc* 2016;5:e003732.

Yannopoulos D, Bartos JA, Raveendran G, et al. Coronary artery disease in patients with out-of-hospital refractory ventricular fibrillation cardiac arrest. *J Am Coll Cardiol* 2017;70:1109–17.

Cho YH, Kim WS, Sung K, et al. Management of cardiac arrest caused by acute massive pulmonary thromboembolism: importance of percutaneous cardiopulmonary support. *ASAIO J* 2014;60:280–3.

Blumenstein J, Leick J, Liebetrau C, et al. Extracorporeal life support in cardiovascular patients with observed refractory in-hospital cardiac arrest is associated with favourable short and long-term outcomes: a propensity-matched analysis. *Eur Heart J Acute Cardiovasc Care* 2016;5:13–22.

Chou TH, Fang CC, Yen ZS, et al. An observational study of extracorporeal CPR for in-hospital cardiac arrest secondary to myocardial infarction. *Emerg Med J* 2014;31:441–7.

Cesana F, Avalli L, Garatti L, et al. Effects of extracorporeal cardiopulmonary resuscitation on neurological and cardiac outcome after ischaemic refractory cardiac arrest. *Eur Heart J Acute Cardiovasc Care* 2017. p. 2048872617737041.

Lee SH, Jung JS, Lee KH, Kim HJ, Son HS, Sun K. Comparison of extracorporeal cardiopulmonary resuscitation with conventional cardiopulmonary resuscitation: is extracorporeal cardiopulmonary resuscitation beneficial? *Korean J Thorac Cardiovasc Surg* 2015;48:318–27.

Patricio D, Peluso L, Brasseur A, et al. Comparison of extracorporeal and conventional cardiopulmonary resuscitation: a retrospective propensity score matched study. *Crit Care* 2019;23:27.

Venturini JM, Retzer E, Estrada JR, et al. Mechanical chest compressions improve rate of return of spontaneous circulation and allow for initiation of percutaneous circulatory support during cardiac arrest in the cardiac catheterization laboratory. *Resuscitation* 2017;115:56–60.

---

## Appendix B (continued). Studies with no-treatment control group that did not fulfill inclusion criteria

---

Studies with no-treatment control group reporting neurological intact survival in patients with refractory cardiac arrest treated with extracorporeal membrane oxygenation.

---

Mazzeffi MA, Sanchez PG, Herr D, et al. Outcomes of extracorporeal cardiopulmonary resuscitation for refractory cardiac arrest in adult cardiac surgery patients. *J Thorac Cardiovasc Surg*. 2016;152:1133–9.

Peigh G, Cavarocchi N, Hirose H. Saving life and brain with extracorporeal cardiopulmonary resuscitation: A single-center analysis of in-hospital cardiac arrests. *The Journal of Thoracic and Cardiovascular Surgery*. 2015;150:1344–9.

Belle L, Mangin L, Bonnet H, et al. Emergency extracorporeal membrane oxygenation in a hospital without on-site cardiac surgical facilities. *EuroIntervention*. 2012;8:375–382.

Bellezzo JM, Shinar Z, Davis DP, et al. Emergency physician-initiated extracorporeal cardiopulmonary resuscitation. *Resuscitation*. 2012;83:966–70.

---

- Christiansen A, Gjedsted J, Greisen JR, et al. Extracorporeal life support (ECLS) for out-of-hospital cardiac arrest in a Scandinavian setting. *Acta Anaesthesiol Scand*. 2015;59.
- Darocho T, Kosinski S, Jarosz A, et al. The chain of survival in hypothermic circulatory arrest: encouraging preliminary results when using early identification, risk stratification and extracorporeal rewarming. *Scand J Trauma Resusc Emerg Med*. 2016;24:85.
- Debaty G, Moustapha I, Bouzat P, et al. Outcome after severe accidental hypothermia in the French Alps: a 10-year review. *Resuscitation*. 2015;93:118–23.
- Fjølner J, Greisen J, Jørgensen MR, et al. Extracorporeal cardiopulmonary resuscitation after out-of-hospital cardiac arrest in a Danish health region. *Acta Anaesthesiol Scand*. 2017;61:176–85.
- Goto T, Morita S, Kitamura T, et al. Impact of extracorporeal cardiopulmonary resuscitation on outcomes of elderly patients who had out-of-hospital cardiac arrests: a single-centre retrospective analysis. *BMJ Open*. 2018;8:e019811.
- Grunau B, Carrier S, Bashir J, et al. A comprehensive regional clinical and educational ECPR protocol decreases time to ECMO in patients with refractory out-of-hospital cardiac arrest. *Can J Emerg Med*. 2017;19:424–33.
- Hase M, Tsuchihashi K, Fujii N, et al. Early defibrillation and circulatory support can provide better long-term outcomes through favorable neurological recovery in patients with out-of-hospital cardiac arrest of cardiac origin. *Circ J*. 2005;69:1302–7.
- Johnson NJ, Acker M, Hsu CH, et al. Extracorporeal life support as rescue strategy for out-of-hospital and emergency department cardiac arrest. *Resuscitation*. 2014;85:1527–32.
- Jouffroy R, Lamhaut L, Guyard A, et al. Base excess and lactate as prognostic indicators for patients treated by extra corporeal life support after out hospital cardiac arrest due to acute coronary syndrome. *Resuscitation*. 2014;85:1764–8.
- Kagawa E, Dote K, Kato M, et al. Should we emergently revascularize occluded coronaries for cardiac arrest?: rapid-response extracorporeal membrane oxygenation and intra-arrest percutaneous coronary intervention. *Circulation* 2012;126:1605–13.
- Lamhaut L, Jouffroy R, Soldan M, et al. Safety and feasibility of prehospital extra corporeal life support implementation by non-surgeons for out-of-hospital refractory cardiac arrest. *Resuscitation*. 2013;84:1525–9.
- Le Guen M, Nicolas-Robin A, Carreira S, et al. Extracorporeal life support following out-of-hospital refractory cardiac arrest. *Crit Care*. 2011;15:R29.
- Lee YH, Oh YT, Ahn HC, et al. The prognostic value of the grey-to-white matter ratio in cardiac arrest patients treated with extracorporeal membrane oxygenation. *Resuscitation*. 2016;99:50–5.
- Leick J, Liebetau C, Szardien S, et al. Door-to-implantation time of extracorporeal life support systems predicts mortality in patients with out-of-hospital cardiac arrest. *Clin Res Cardiol*. 2013;102:661–9.
- Mochizuki K, Imamura H, Iwashita T, Okamoto K. Neurological outcomes after extracorporeal cardiopulmonary resuscitation in patients with out-of-hospital cardiac arrest: a retrospective observational study in a rural tertiary care center. *J Intensive Care*. 2014;2:33.
- Park JH, Song KJ, Shin SD, Ro YS, Hong KJ. Time from arrest to extracorporeal cardiopulmonary resuscitation and survival after out-of-hospital cardiac arrest. *Emergency Medicine Australasia*. 2019;31:1073–81.
- Pozzi M, Koffel C, Armoiry X, et al. Extracorporeal life support for refractory out-of-hospital cardiac arrest: should we still fight for? A single-centre, 5-year experience. *Int J Cardiol*. 2016;204:70–6.
- Lamhaut L, Tea V, Raphalen JH, et al. Coronary lesions in refractory out of hospital cardiac arrest (OHCA) treated by extra corporeal pulmonary resuscitation (ECPR). *Resuscitation*. 2018;126:154–9.
- Sawamoto K, Bird SB, Katayama Y, et al. Outcome from severe accidental hypothermia with cardiac arrest resuscitated with extracorporeal cardiopulmonary resuscitation. *Am J Emerg Med*. 2014;32:320–4.
- Avalli L, Maggioni E, Formica F, et al. Favourable survival of in-hospital compared to out-of-hospital refractory cardiac arrest patients treated with extracorporeal membrane oxygenation: an Italian tertiary care centre experience. *Resuscitation* 2012;83:579–83.
- Dennis M, McCanny P, D'Souza M, et al. Extracorporeal cardiopulmonary resuscitation for refractory cardiac arrest: A multicentre experience. *Int J Cardiol*. 2017;231:131–6.
- Ellouze O, Vuillet M, Perrot J, et al. Comparable Outcome of Out-of-Hospital Cardiac Arrest and In-Hospital Cardiac Arrest Treated With Extracorporeal Life Support. *Artificial Organs*. 2017;42:15–21.
- Fagnoul D, Taccone FS, Belhaj A, et al. Extracorporeal life support associated & with hypothermia and normoxemia in refractory cardiac arrest. *Resuscitation*. 2013; 84:1519–24.
- Han KS, Kim SJ, Lee EJ, Jung JS, Park JH, Lee SW. Experience of extracorporeal cardiopulmonary resuscitation in a refractory cardiac arrest patient at the emergency department. *Clin Cardiol*. 2019;42:459–66.
- Haneya A, Philipp A, Diez C et al. A 5-year experience with cardiopulmonary resuscitation using extracorporeal life support in nonpostcardiotomy patients with cardiac arrest. *Resuscitation*. 2012; 83:133–37.
-

- Kagawa E, Inoue I, Kawagoe T, et al. Assessment of outcomes and differences between in- and out-of-hospital cardiac arrest patients treated with cardiopulmonary resuscitation using extracorporeal life support. *Resuscitation*. 2010;81:968–73.
- Kim YS, Cho YH, Sung K, et al. Target temperature management may not improve clinical outcomes of extracorporeal cardiopulmonary resuscitation. *J Intensive Care Med* 2018;34:790–6.
- Lamhaut L, Hutin A, Puymirat E, et al. A pre-hospital extracorporeal cardio pulmonary resuscitation (ECPR) strategy for treatment of refractory out hospital cardiac arrest: an observational study and propensity analysis. *Resuscitation*. 2017;117:109–117.
- Liu Y, Cheng YT, Chang JC, Chao SF, Chang BS. Extracorporeal membrane oxygenation to support prolonged conventional cardiopulmonary resuscitation in adults with cardiac arrest from acute myocardial infarction at a very low-volume centre. *Interact Cardiovasc Thorac Surg*. 2011;12:389–93.
- Lee SW, Han KS, Park JS, Lee JS, Kim SJ. Prognostic indicators of survival and survival prediction model following extracorporeal cardiopulmonary resuscitation in patients with sudden refractory cardiac arrest. *Ann Intensive Care*. 2017;7:87.
- Mégarbane B, Deye N, Aout M, et al. Usefulness of routine laboratory parameters in the decision to treat refractory cardiac arrest with extracorporeal life support. *Resuscitation*. 2011;82:1154–61.
- Pang PYK, Wee GHL, Huang MJ, et al. Therapeutic hypothermia may improve neurological outcomes in extracorporeal life support for adult cardiac arrest. *Hear Lung Circ* 2017;26:817–824.
- Pozzi M, Armoiry X, Achana et al. Extracorporeal Life Support for Refractory Cardiac Arrest: A 10-Year Comparative Analysis. *Ann Thorac Surg*. 2019;107:809-816.
- Poppe M, Schriefl C, Steinacher A, et al. Extracorporeal cardiopulmonary resuscitation at the emergency department. *European Journal of Anaesthesiology*. 2020;37:280–5.
- Spangenberg T, Meincke F, Brooks S, et al. “Shock and Go?” extracorporeal cardio-pulmonary resuscitation in the golden-hour of ROSC. *Catheter Cardiovasc Interv*. 2016;88:691–6.
- Stub D, Bernard S, Pellegrino V, et al. Refractory cardiac arrest treated with mechanical CPR, hypothermia, ECMO and early reperfusion (the CHEER trial). *Resuscitation*. 2015;86:88–94.
-
