# Supplementary material for: Long-term neurologically intact survival after extracorporeal cardiopulmonary resuscitation for in-hospital or out-of-hospital cardiac arrest: A systematic review and meta-analysis
Source: PubMed Central journal article supplement — Resusc Plus. 2020 Dec 11;4:100045. doi: 10.1016/j.resplu.2020.100045 (PMC8244502; doi:10.1016/j.resplu.2020.100045), 2020-12-11
Supplement: mmc6.pdf [file mmc6.pdf]

**Appendix C.** Overview of ongoing clinical trials of extracorporeal cardiopulmonary resuscitation for cardiac arrest

| NCT Number  | Country     | Estimated completion | Estimated enrollment | Study title/Acronym                                                                                                                    | Interventions                                                                                                             |
|-------------|-------------|----------------------|----------------------|----------------------------------------------------------------------------------------------------------------------------------------|---------------------------------------------------------------------------------------------------------------------------|
| NCT02527031 | France      | 2020                 | 210                  | A Comparative Study Between a Pre-hospital and an In-hospital Circulatory Support Strategy (ECMO) in Refractory Cardiac Arrest APACAR2 | Other: ECMO insertion on pre-hospital setting<br>Other: In-hospital extracorporeal membrane oxygenation (ECMO)            |
| NCT03700125 | UK          | 2020                 | 6                    | Pre-hospital ECMO in Advance resuscitation in Patient With Refractory Cardiac Arrest (SUB30)                                           | Procedure: ECMO resuscitation                                                                                             |
| NCT03065647 | USA         | 2020                 | 30                   | Extracorporeal CPR for Refractory Out-of-Hospital Cardiac Arrest (EROCA)                                                               | Device: Expedited transport with mechanical cardiopulmonary resuscitation (CPR)                                           |
| NCT01605409 | Austria     | 2020                 | 40                   | Emergency Cardiopulmonary Bypass for Cardiac Arrest (ECPB4OHCA)                                                                        | Procedure: Emergency cardiopulmonary bypass under ongoing CPR<br>Procedure: Standard advanced cardiac life support (ACLS) |
| NCT03101787 | Netherlands | 2021                 | 110                  | Early Initiation of Extracorporeal Life Support in Refractory OHCA (INCEPTION)                                                         | Procedure: Extracorporeal cardiopulmonary resuscitation (ECPR)                                                            |
| NCT03880565 | USA         | 2023                 | 180                  | Advanced Reperfusion Strategies for Refractory Cardiac Arrest (ARREST)                                                                 | Device: Early ECMO facilitated resuscitation<br>Device: Standard ACLS resuscitation                                       |
| NCT02832752 | Canada      | 2023                 | 480                  | The BC Extracorporeal Cardiopulmonary Resuscitation Trial for Refractory Out-of-Hospital Cardiac Arrest                                | Procedure: ECPR protocol                                                                                                  |
| NCT03352999 | France      | 2023                 | 50                   | Cardiac Arrest Extra Corporeal Oxygenation Membrane (CAREECMO)                                                                         | Procedure: Fast track access to venoarterial extracorporeal membrane oxygenation                                          |

**Appendix C (continued).** Search strategy for the International Clinical Trials Registry Platform

| Key words                                 | Trials |
|-------------------------------------------|--------|
| ECPR                                      | 11     |
| VA-ECMO                                   | 10     |
| ECLS AND arrest                           | 2      |
| ECMO AND arrest                           | 12     |
| VA-ECMO AND arrest                        | 4      |
| extra corporeal AND arrest                | 4      |
| extracorporeal cardiopulmonary            | 5      |
| extracorporeal cardiopulmonary AND arrest | 7      |
